# Supplementary material for: Improving access to primary healthcare for vulnerable populations in Australia and Canada: protocol for a mixed-method evaluation of six complex interventions
Source: PubMed Central journal article supplement — BMJ Open. 2019 Jul 27;9(7):e027869. doi: 10.1136/bmjopen-2018-027869 (PMC6661687; doi:10.1136/bmjopen-2018-027869), 2019-07-27
Supplement: bmjopen-2018-027869supp002.pdf [file bmjopen-2018-027869supp002.pdf]

Appendix 2. Levesque et al.'s conceptual framework of access to health care

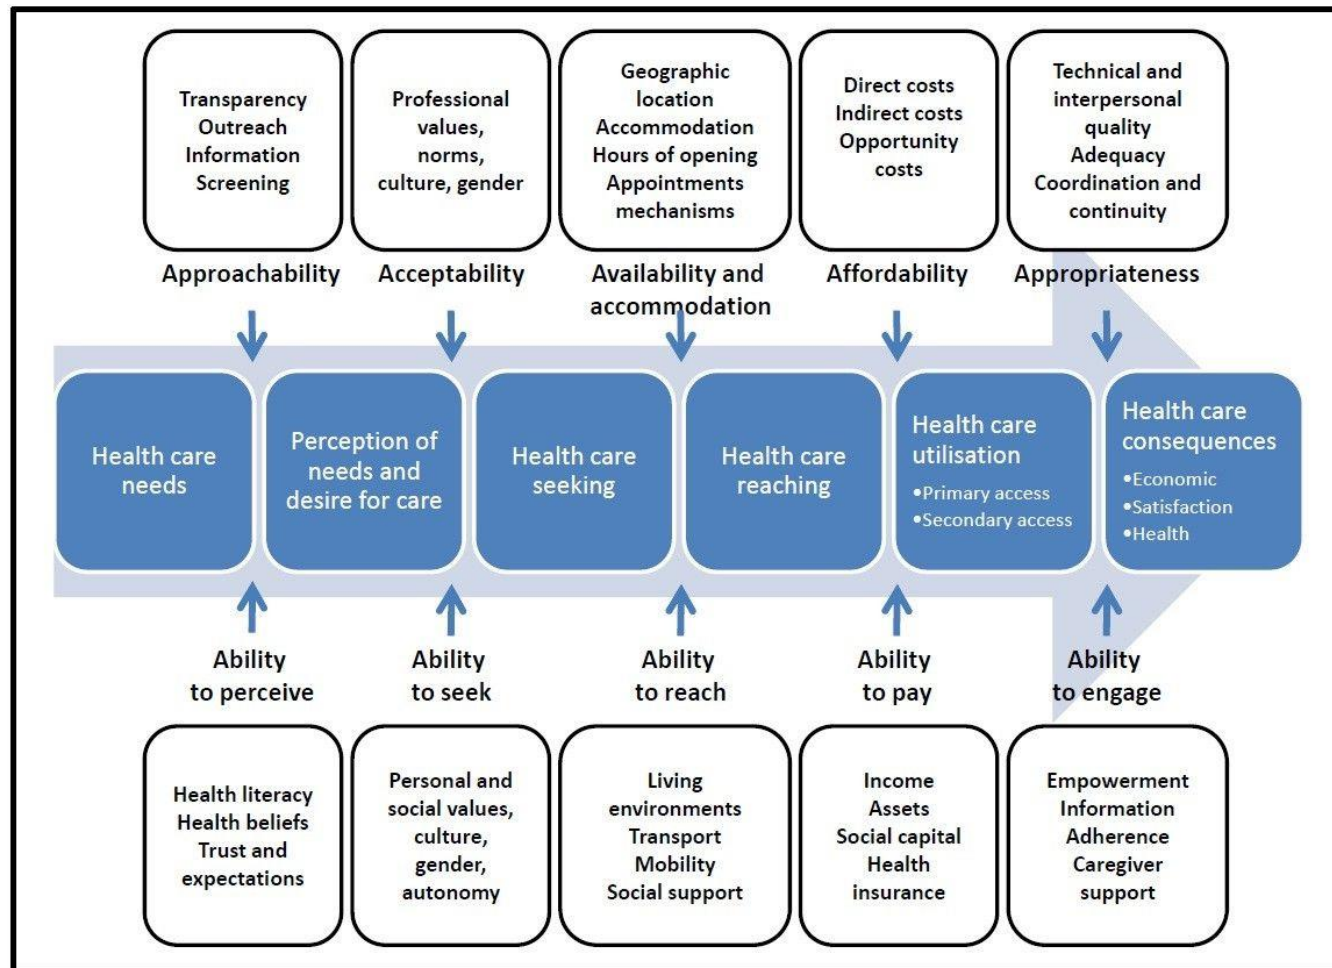

Adapted from: Levesque JF, Harris MF, Russell G. Patient-centred access to health care: conceptualising access at the interface of health systems and populations. *Int J Equity Health* 2013;**12**:18.
