# Supplementary material for: Improving access to primary healthcare for vulnerable populations in Australia and Canada: protocol for a mixed-method evaluation of six complex interventions
Source: PubMed Central journal article supplement — BMJ Open. 2019 Jul 27;9(7):e027869. doi: 10.1136/bmjopen-2018-027869 (PMC6661687; doi:10.1136/bmjopen-2018-027869), 2019-07-27
Supplement: bmjopen-2018-027869supp003.pdf [file bmjopen-2018-027869supp003.pdf]

## Overarching IMPACT interventions logic map

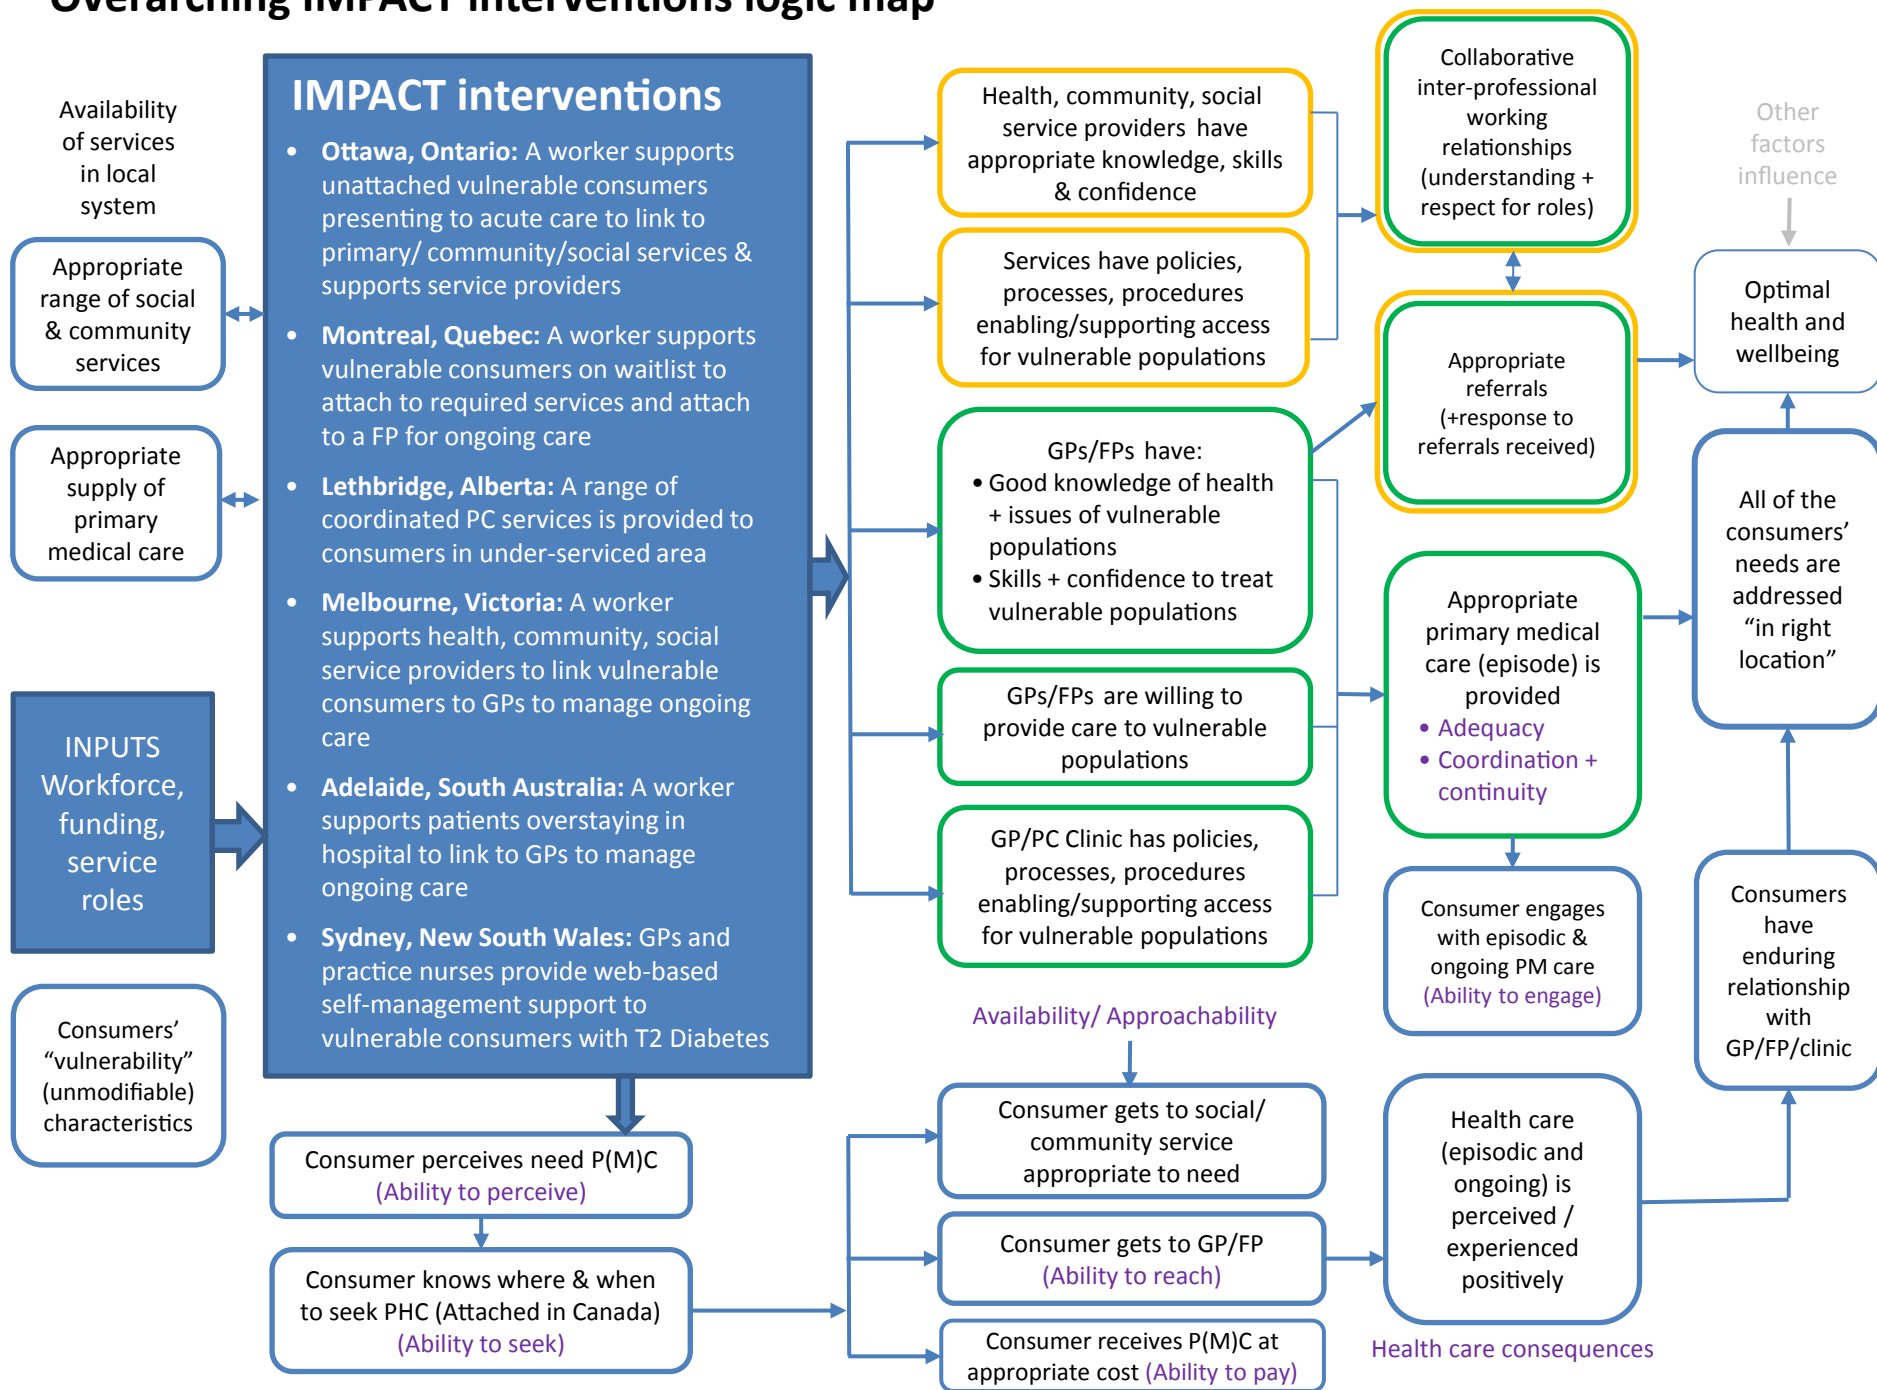

Footnote: Each box in the Logic Map expresses a domain at a general level on the pathway to enhance PHC access for vulnerable populations. There is a general underlying temporal/causal flow from left to right. The dark blue box represents inputs and activities from all the interventions. Arrows have been included to provide a guide to the kind of causal pathways that have been expressed. Domains relevant to key stakeholders are arranged in vertical layers, with colour used systematically: a) Orange boxes relate to health, community and social service providers other than FPs; b) Green boxes relate to FPs and their organizations (clinics); c) Blue boxes relate to consumers/patients; d) References to Levesque et al.'s Access to Care Framework (20) are in purple.
